# Supplementary material
Source: PubMed Central journal article supplement (PMC424415)
Supplement: 7600222s1.pdf [file 7600222s1.pdf]

Supplementary Figure 1

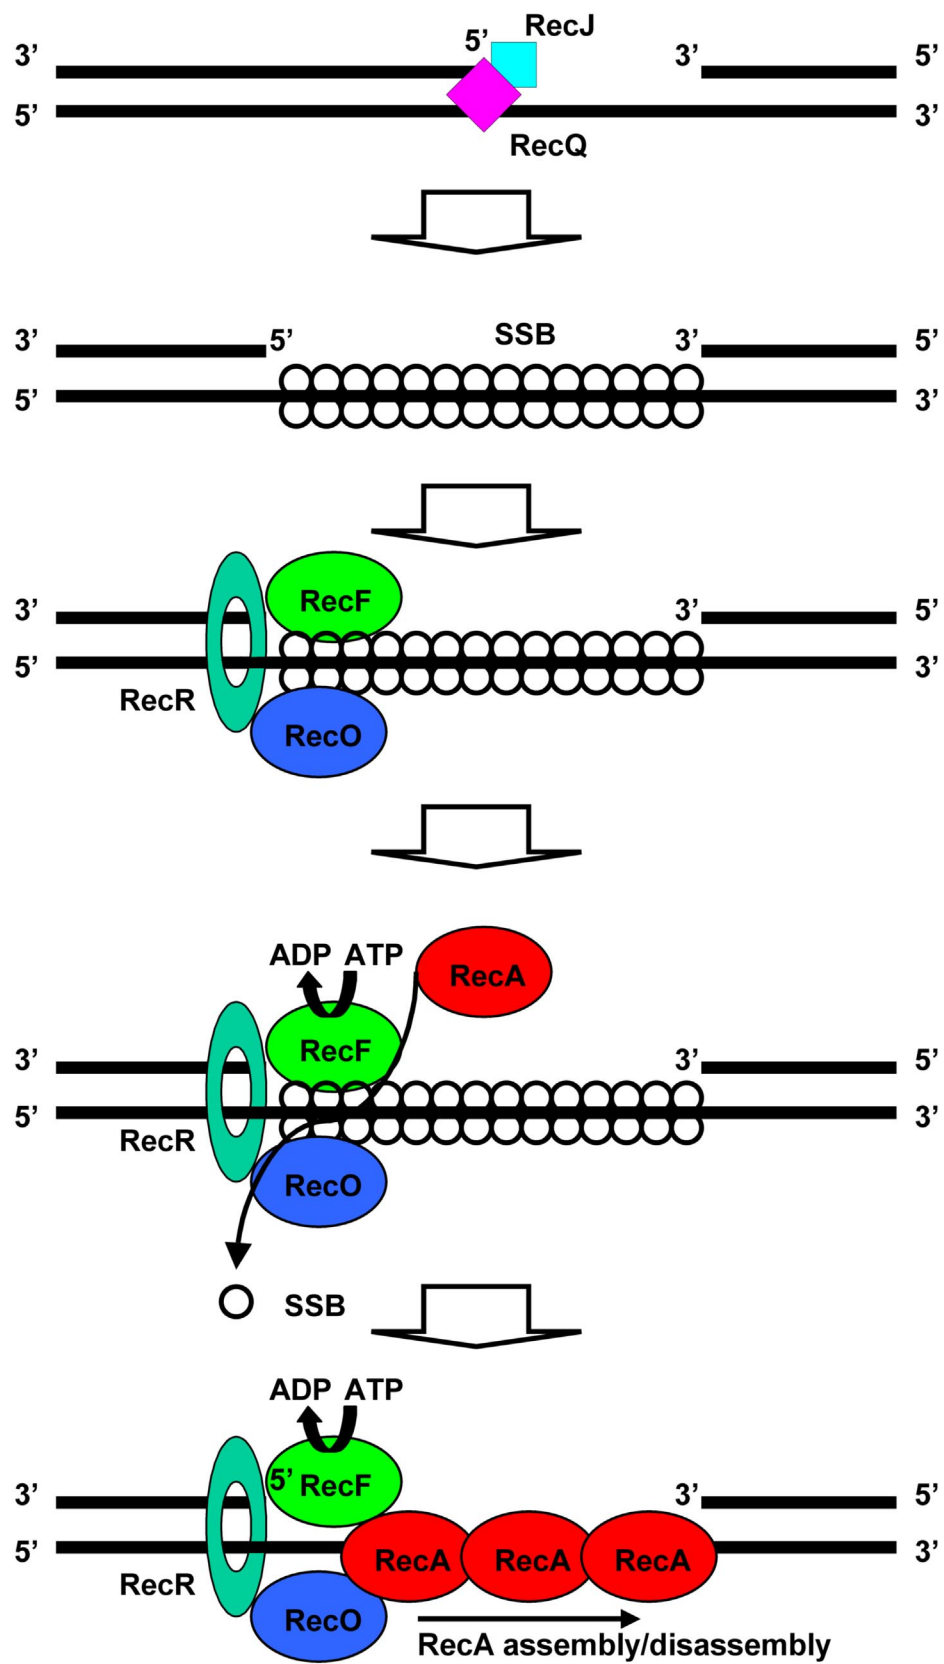

## Legend to Supplementary Figure

**Fig. S1.** A simplified working model for the RecA filament formation onto gapped DNA via RecF pathway. For the *E. coli* RecA, both filament extension and disassembly occur in the 5' to 3' direction on ssDNA (Bork *et al.*, 2001). *E. coli* and typical RecA proteins form a filament on ssDNA first, whereas the unusual *D. radiodurans* RecA forms a filament first on dsDNA (Kim and Cox, 2002).

## References to Supplementary Figure

Bork JM, Cox MM, Inman RB (2001) RecA protein filaments disassemble in the 5' to 3' direction on single-stranded DNA. *J Biol Chem* **276**: 45740-45743

Kim J-I, Cox MM (2002) The RecA proteins of *Deinococcus radiodurans* and *Escherichia coli* promote DNA strand exchange via inverse pathways. *Proc Natl Acad Sci USA* **99**: 7917-7921
